# Supplementary material for: Multi-functional derivatization of amine, hydroxyl, and carboxylate groups for metabolomic investigations of human tissue by electrospray ionization mass spectrometry
Source: Royal Society of Chemistry journal article supplement (doi:10.1039/c8an00490k), 2018-01-01
Supplement: c8an00490k1.pdf [file c8an00490k1.pdf]

*Research Article to be submitted to*

***Analyst***

***Supplemental Information***

**Multi-Functional Group Derivatization of Amines, Hydroxyls, and Carboxylates for  
Metabolomic Investigations of Human Tissue by Electrospray Ionization Mass  
Spectrometry**

*Tianjiao Huang<sup>||</sup>, Maria Toro, Dawn S. Hui, Richard Lee, and James L.  
Edwards\*<sup>||‡</sup>*

*<sup>||</sup>Department of Chemistry and Biochemistry, Saint Louis University,  
3501 Laclede Ave, Saint Louis, MO 63102*

**Figure S1.** Dimethylaminoacetyl chloride tagging of amine and hydroxyl groups. Time course of tagged glycine and threonine. The signal response was determined from reconstituted ion chromatograms. Results were determined by mean  $\pm$  SD from 3 independent samples.

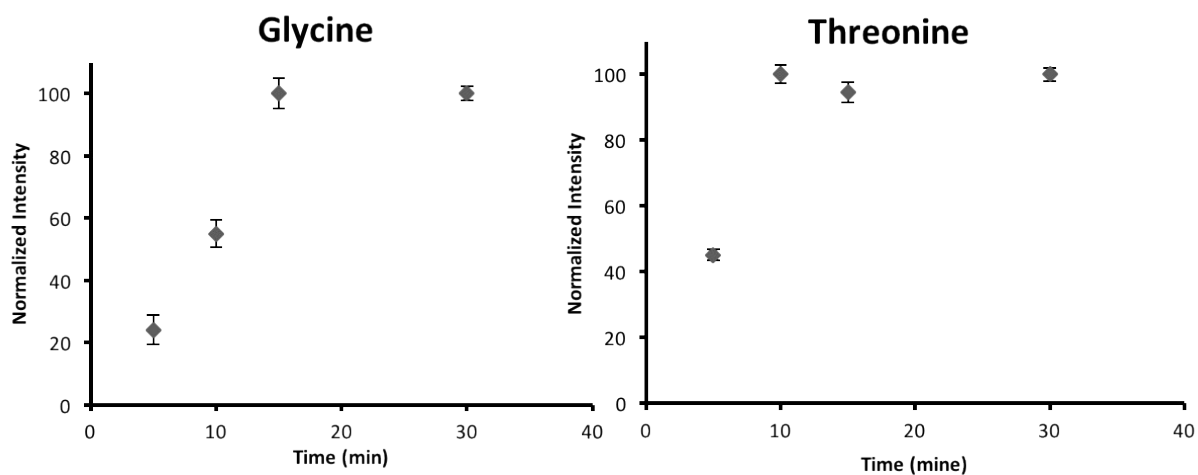

**Figure S2.** Dimethylaminoacetyl chloride and N, N-Diethylethylenediamine two step tagging of amine and carboxylate groups. Time course of tagged glycine and succinate. The signal response was determined from reconstituted ion chromatograms. Results were determined by mean  $\pm$  SD from 3 independent samples.

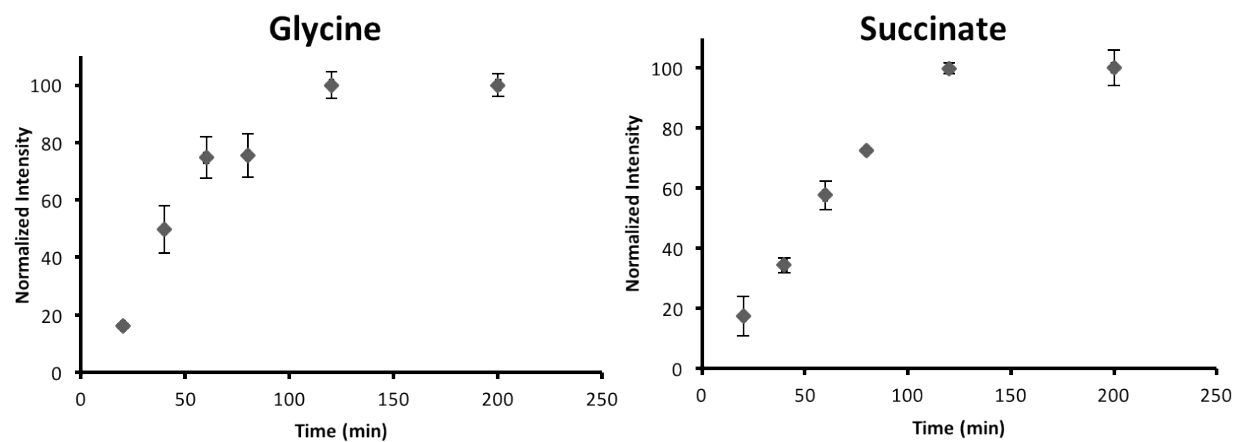

**Figure S3.** Comparison of Dimethylaminoacetyl chloride tagging and Dimethylaminoacetyl chloride and N, N-Diethylethylenediamine two step tagging. The signal response was determined from reconstituted ion chromatograms. The concentration of standards is 5 $\mu$ M. Results were determined by mean  $\pm$  SD from 3 independent samples, n=3.

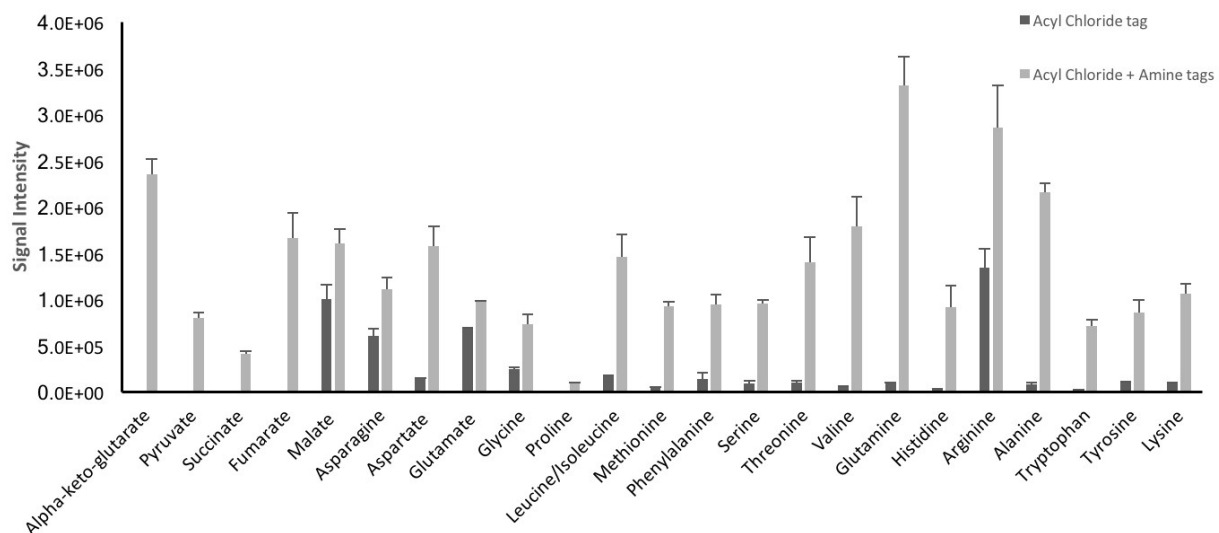

**Figure S4.** Reconstituted ion chromatogram of LC-MS/MS parent ion dependent scan (TSQ Quantum Access MAX, Thermo Scientific) for methionine and methionine- $d_3$  (S-methyl- $d_3$ ). Black denotes total ion chromatogram of fragmentation for parent ions range from 150-300  $m/z$ s with product scanning mass of 73 and 86  $m/z$ . These  $m/z$  (73 and 86) are indicative of compounds which contain the tag. Green and red denotes reconstituted ion chromatograms of both deuterated and non-deuterated methionine. Green denotes expected methionine- $d_3$  (25  $\mu$ M) and red denotes methionine (75  $\mu$ M) parent masses. Chromatograms A and B are normalized to the highest intensity peak of the respective chromatogram and set to 100%. (A) Dimethylaminoacetyl chloride reaction of methionine and methionine- $d_3$  (S-methyl- $d_3$ ). Peaks at 12.5 and 13.7 min are hydrolyzed tag. Peaks at 20.5 min shows detection of both deuterated and non-deuterated methionine. (B) Dimethylaminoacetyl chloride and N, N-Diethylethylenediamine two step tagging of methionine and methionine- $d_3$  (S-methyl- $d_3$ ). Peaks at 13.4 and 16.3 are the result of the acyl chloride tag and the amine tag reacting with each other. Each chromatographic peak was carefully examined for a difference of 3Da. Only derivatized analytes of interests showed 3 Da difference. Taken together, these data indicate that no detectable analyte side reactions are occurring in this system. Chromatograms C and D correspond to A and B above, but without normalization. (C) Normalized Chromatograms of Dimethylaminoacetyl chloride labeled deuterated methionine and methionine. (D) Normalized chromatograms of Dimethylaminoacetyl chloride and N, N-Diethylethylenediamine two step tagged deuterated methionine and methionine.

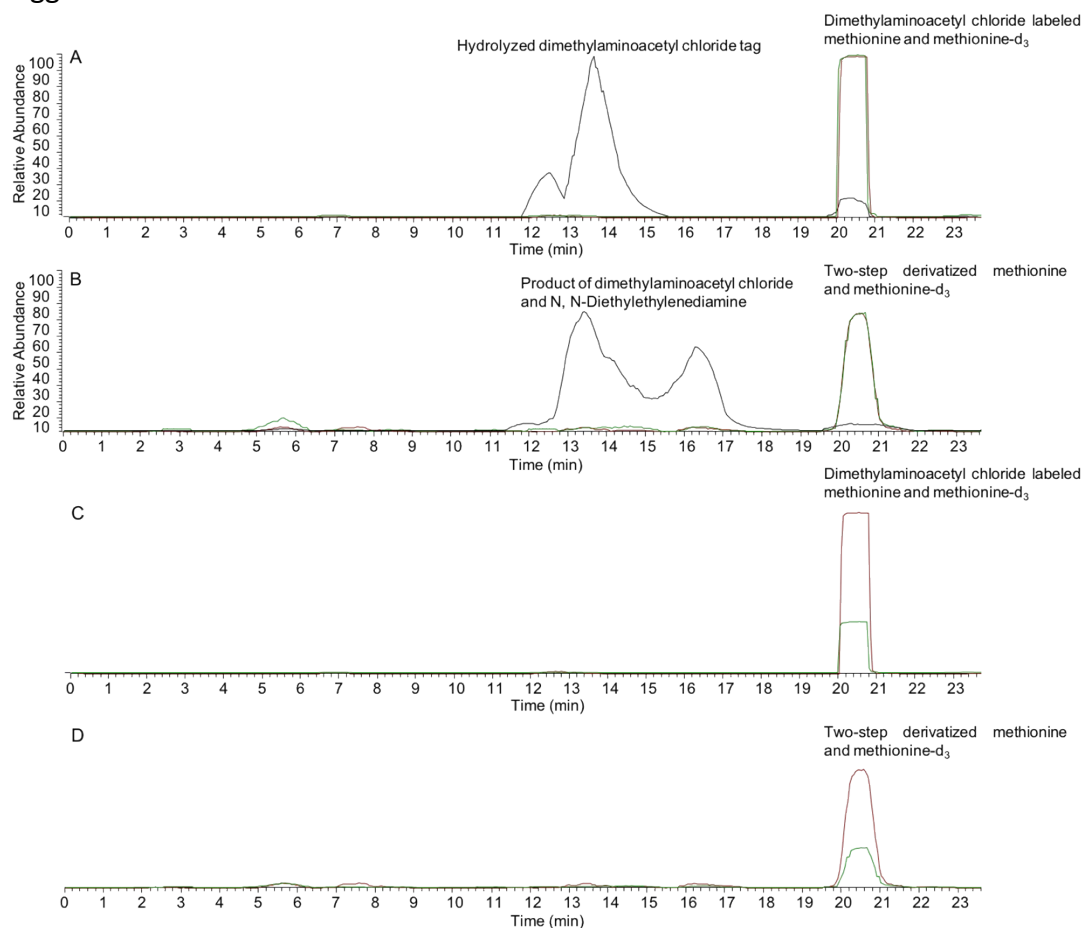

**Table S1:** Interfering solvent and reagent m/z and interfered analytes

| Interfering solvent and reagent | m/z           | Interfered analytes                                                                          |
|---------------------------------|---------------|----------------------------------------------------------------------------------------------|
| DMSO                            | 157.50-158.50 | 2 tagged succinate m/z 158.14, fumarate m/z 157.13<br>2 tagged leucine/isoleucine m/z 158.14 |
| HOAt                            | 136.50-137.50 | 2 tagged alanine m/z 137.12                                                                  |

**Table S2:** Number of tags and number of functional groups that were labeled in each metabolite

|                      | number of tags | number of hydroxyl/primary amine/carboxylate groups |
|----------------------|----------------|-----------------------------------------------------|
| Alpha-keto-glutarate | 2              | 2                                                   |
| Pyruvate             | 1              | 1                                                   |
| Succinate            | 2              | 2                                                   |
| Fumarate             | 2              | 2                                                   |
| Malate               | 3              | 3                                                   |
| Asparagine           | 2              | 2                                                   |
| Aspartate            | 3              | 3                                                   |
| Glutamate            | 3              | 3                                                   |
| Glycine              | 2              | 2                                                   |
| Proline              | 1              | 1                                                   |
| Leucine/Isoleucine   | 2              | 2                                                   |
| Methionine           | 2              | 2                                                   |
| Phenylalanine        | 2              | 2                                                   |
| Serine               | 3              | 3                                                   |
| Threonine            | 3              | 3                                                   |
| Valine               | 2              | 2                                                   |
| Glutamine            | 2              | 2                                                   |
| Histidine            | 2              | 2                                                   |
| Arginine             | 2              | 2                                                   |
| Alanine              | 2              | 2                                                   |
| Tryptophan           | 2              | 2                                                   |
| Tyrosine             | 3              | 3                                                   |
| Lysine               | 3              | 3                                                   |
